# Supplementary material for: Comparison of radiofrequency ablation and ablative external radiotherapy for the treatment of intrahepatic malignancies: A hybrid meta-analysis
Source: PubMed Central journal article supplement — JHEP Rep. 2022 Sep 22;5(1):100594. doi: 10.1016/j.jhepr.2022.100594 (PMC9763860; doi:10.1016/j.jhepr.2022.100594), 2022-09-22
Supplement: mmc1.pdf [file mmc1.pdf]

# Comparison of radiofrequency ablation and ablative external radiotherapy for the treatment of intrahepatic malignancies: A hybrid meta-analysis

Chai Hong Rim, Jung Sue Lee, Soo Yeon Kim, Jinsil Seong

## Table of contents

|                              |    |
|------------------------------|----|
| Supplementary data 1.....    | 2  |
| Fig. S1.....                 | 3  |
| Table S1.....                | 4  |
| Table S2.....                | 5  |
| Table S3.....                | 8  |
| Supplementary reference..... | 10 |

## **Supplementary data 1. Draft of search strategy**

### **Search strategy in Embase and Medline**

#1 ((rfa OR 'radiofrequency'/exp OR radiofrequency) AND ('sbrt'/exp OR sbrt OR stereotactic OR proton OR cyberknife) AND (hcc OR hepatocellular OR 'liver'/exp OR liver))

#2 AND ('article'/it OR 'conference abstract'/it)

\*#1 is our basic strategy using Emtree; #2 is to filter studies with irrelevant formats (e.g. reviews, editorials, letters, conference abstracts)

### **Search terms used in Pubmed and Cochrane library**

Pubmed: ((rfa OR 'radiofrequency'/exp OR radiofrequency) AND ('sbrt'/exp OR sbrt OR stereotactic OR proton OR cyberknife) AND (hcc OR hepatocellular OR 'liver'/exp OR liver)) NOT review[PT]

Cochrane library: ((rfa OR 'radiofrequency'/exp OR radiofrequency) AND ('sbrt'/exp OR sbrt OR stereotactic OR proton OR cyberknife) AND (hcc OR hepatocellular OR 'liver'/exp OR liver))

**Fig. S1.** Funnel plots of pooled analyses of primary endpoints (odd ratio in comparison of RFA vs SBRT arms). No significant publication bias was noted regarding pooled comparative analyses of local control ( $p=0.824$ ) and overall survival ( $p=0.468$ ).

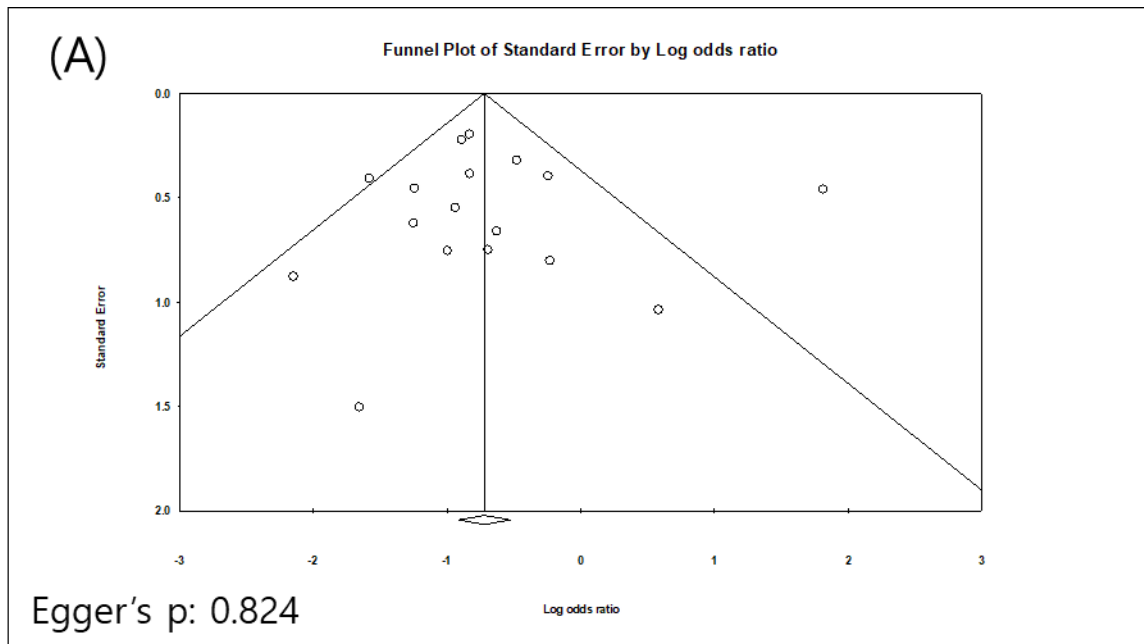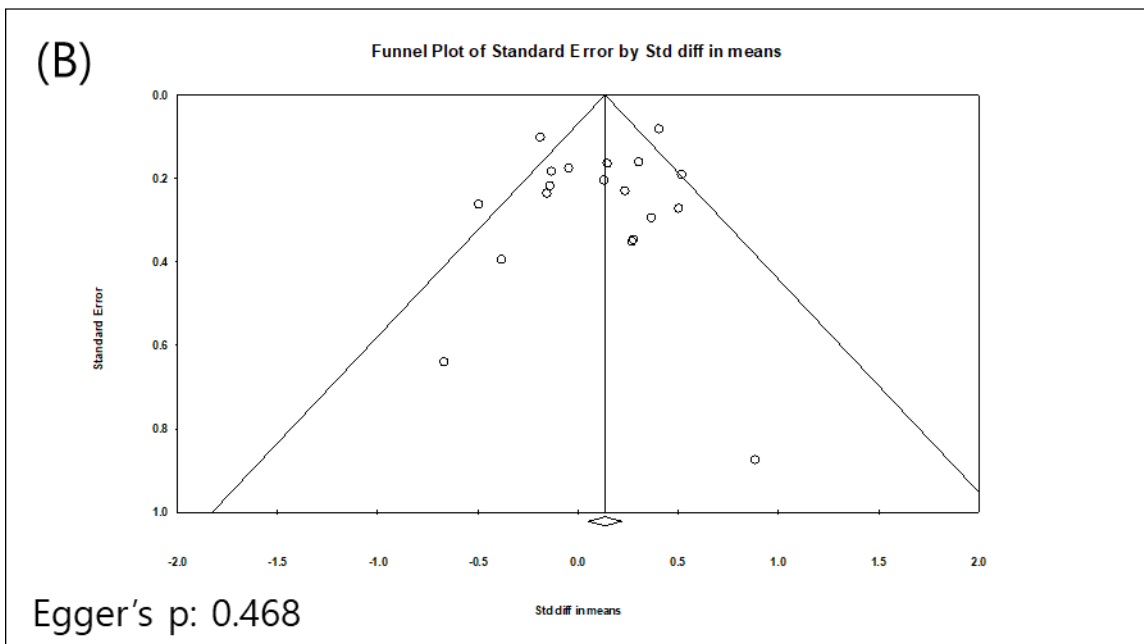

**Table S1.** Grading classification system recommended by American Society of Radiation Oncology (Ref. Apisarnthanarax et al., Practical Radiation Oncology (2021) 000, 1–24 [1])

| Quality of evidence grade | Study types and quality                                                                                                                                                                                                                                                                                                               | Evidence interpretation                                                                                                                                                                                            |
|---------------------------|---------------------------------------------------------------------------------------------------------------------------------------------------------------------------------------------------------------------------------------------------------------------------------------------------------------------------------------|--------------------------------------------------------------------------------------------------------------------------------------------------------------------------------------------------------------------|
| High                      | 2 or more well-conducted and highly generalizable RCTs or meta-analyses of such trials.                                                                                                                                                                                                                                               | The true effect is very likely to lie close to the estimate of the effect based on the body of evidence.                                                                                                           |
| Moderate                  | 1 well-conducted and highly generalizable RCT or a meta-analysis of such trials OR<br>2 or more RCTs with some weaknesses of procedure or generalizability OR<br>2 or more strong observational studies with consistent findings.                                                                                                     | The true effect is likely to be close to the estimate of the effect based on the body of evidence, but it is possible that it is substantially different.                                                          |
| Low                       | 1 RCT with some weaknesses of procedure or generalizability OR<br>1 or more RCTs with serious deficiencies of procedure or generalizability or extremely small sample sizes OR<br>2 or more observational studies with inconsistent findings, small sample sizes, or other problems that potentially confound interpretation of data. | The true effect may be substantially different from the estimate of the effect. There is a risk that future research may significantly alter the estimate of the effect size or the interpretation of the results. |
| Expert opinion            | Consensus of the panel based on clinical judgment and experience, due to absence of evidence or limitations in evidence.                                                                                                                                                                                                              | Strong consensus ( $\geq 90\%$ ) of the panel guides the recommendation despite insufficient evidence to discern the true magnitude and direction of the net effect. Further research may better inform the topic. |

**Table S2.** Full table of clinical information of included studies

| Author          | Subject of study | No. of patients (No. of tumors)              | RT profile                  | Target patients                                                                      | % of prior liver-directed Tx | Propensity matching               | Imaging criteria, Definition of local control                    | Local control                       |                           | p value | Overall survival                         |                           | p value |
|-----------------|------------------|----------------------------------------------|-----------------------------|--------------------------------------------------------------------------------------|------------------------------|-----------------------------------|------------------------------------------------------------------|-------------------------------------|---------------------------|---------|------------------------------------------|---------------------------|---------|
|                 |                  |                                              |                             |                                                                                      |                              |                                   |                                                                  | RFA (1/2/3 years)                   | Ablative RT (1/2/3 years) |         | RFA (1/2/3 years)                        | Ablative RT (1/2/3 years) |         |
| Ahuja, 2014     | HCC              | TACE & RFA 32<br>TACE & SBRT 32              |                             |                                                                                      |                              | NA                                |                                                                  | PFS mean 48.5 months Vs 26.1 months |                           | 0.026   | mean survival period 54.2 Vs 36.2 months |                           | 0.31    |
| Shiozawa, 2015  | HCC              | RFA 38, Cyberknife 35 (patients n = tumor n) | 60 Gy (3-5F)                | RFA: solitary HCC <=3cm, unfeasible for surgery<br>SBRT: solitary HCC <=5cm, CPC <=8 |                              | No; SBRT arm had negative factors | recurrence of <2cm of the treated lesion                         | 97.4/89.4/76.3 %                    | 97.1/91.4/74.3%           | 0.71    | 100% (1 year)                            | 95.2% (1 year)            | 0.075   |
| Wahl, 2016      | HCC              | RFA 161, SBRT 63 (tumors: RFA 249, SBRT 83)  | 27-60 Gy (3-5F)             | localized HCC                                                                        | RFA M0 (0-7); SBRT M2 (0-7)  | Yes (IPTW)                        | RECIST, absence of progressive disease                           | 83.6/80.2/75.1 % (tumors)           | 97.4/83.8/83.8% (tumors)  | 0.016   | 69.6/52.9% (1,2 years)                   | 74.1, 46.3% (1,2 years)   | NS      |
| Duan, 2016      | HCC              | RFA 40, SBRT 37 (patients n = tumor n)       |                             | inoperable, single HCC <5cm                                                          |                              | No; no statistical differences    |                                                                  | 90.0/85.0/82.5 %                    | 94.6/91.9/89.2%           | 0.394   | 97.5/87.5/82.5 %                         | 94.6/81.1/70.3 %          | 0.209   |
| Feng, 2016      | HCC              | RFA 78, SBRT 78                              | na                          | T1-2N0, >65 yrs old                                                                  |                              | Yes (PSM)                         |                                                                  | na                                  | na                        |         | mean OS 2.25 yrs                         | mean OS 2.04 yrs          | 0.06    |
| Rajyaguru, 2018 | HCC              | RFA 521, SBRT 296                            | na                          | T1-2N0                                                                               |                              | Yes (PSM)                         |                                                                  | na                                  | na                        |         | 85.9/65.0/47.5 %                         | 76.3/47.2/34.4 %          | <0.001  |
| Kim, 2019       | HCC              | RFA 95, SBRT 95 (patients n = tumor n)       | mostly 60Gy/4 F or 52Gy/4 F | localized HCC ≤3 in number and <5cm in max. diameter                                 | RFA 87.4% SBRT 92.6%         | Yes (PSM)                         | mRECIST, without progression in PTV or adjacent to ablation zone | 76.1/64.9/60.9 %                    | 83.7/74.9/66.8%           | 0.243   | 87.1/71.8/55.5 %                         | 86.9/76.4/69.0 %          | 0.667   |

|               |     |                              |                               |                                                                              |                            |                                   |                                                                    |                        |                        |         |                     |                        |       |
|---------------|-----|------------------------------|-------------------------------|------------------------------------------------------------------------------|----------------------------|-----------------------------------|--------------------------------------------------------------------|------------------------|------------------------|---------|---------------------|------------------------|-------|
| Hara, 2019    | HCC | RFA 106, SBRT-HFRT 106       | 35-40Gy/5 For 36-45GY/1 2-15F | localized HCC ≤3cm, 3 or less in numbers, curative intent                    | RFA 52%, SBRT 54%          | Yes                               | mRECIST                                                            | 79.8% (3 years)        | 93.2% (3 years)        | <0.01   | 93/84.2/69.1%       | 95.2/87.3/70.4 %       | 0.86  |
| Ji R, 2022    | HCC | RFA 38 SBRT 22               | 27.5-50Gy in 5F               | ≤5cm in size ≤3 in number CPC A or B                                         | All received prior TACE    | No; SBRT arm had negative factors | mRECIST, not PD                                                    | 94.7% (overall)        | 90.9% (overall)        | 0.566   | 100/75% (1,2 years) | 88.2/85.7% (1,2 years) | 0.576 |
| Ueno, 2021    | HCC | RFA 62 SBRT 31 (after PSM)   | 40Gy in 5F                    | single HCC ≤3cm                                                              | RFA 1.7% SBRT 65.2%        | Yes                               | RECIST                                                             | 100/93/87%             | 100/100/100 %          | 0.024   | 95.2/84.2/70.9      | 90.3/73.3/67.3         | 0.401 |
| Kim N, 2020   | HCC | RFA 313 SBRT 313 (after PSM) | MEQD 2 72Gy (IQR 65.6-88.0)   | maximum ≤6 cm for a single tumor sum of diameters ≤6 cm for up to 3 lesions. | RFA 82.1% SBRT 84.3%       | Yes                               | mRECIST                                                            | 73.8/68.9/65.7 %       | 90.2/83.6/82 %         | <0.00 1 | 87.6/71.1/58.5 %    | 88.4/77.6/62.6 %       |       |
| Kim T, 2021   | HCC | RFA 56 PBT 80                | 66GyE in 10 F                 | HCCs ≤3cm in size, ≤2 in numbers                                             | RFA 46.4% PBT 47.5%        | RCT                               | RECIST, no recurrence within 1cm margin of PTV or ablation zone    | 85.6/83.9/77.6         | 97.6/94.8/88.3         | 0.123   | 98.4/92.9/87.2      | 96.1/88.8/79.0         | 0.6   |
| Moon, 2019    | HCC | RFA 529 SBRT 387 lesions     |                               |                                                                              |                            | No; SBRT arm had negative factors |                                                                    | 82.9% (1 year, tumors) | 92.2% (1 year, tumors) | <0.00 1 |                     |                        |       |
| Chen LC, 2019 | HCC | RFA 84 SBRT 24               | 40-54Gy in 5-6F               |                                                                              | RFA m0.07 SBRT m1.96 times | No; SBRT arm had negative factors |                                                                    | 77.8/63.8/59.4 %       | 93.8/93.8/93.8%        | 0.03    | 90.5/78.5/67,7      | 74.4/59.5/59.5         | 0.022 |
| Jeong, 2021   | HCC | RFA 172 SBRT 87 (after IPTW) | M45 Gy in 3F                  | ≤3cm in size, ≤3 in numbers                                                  | RFA 52% SBRT 95.4%         | Yes (IPTW)                        | no recurrence in edge of RFA zone, tumor increase in targeted area | 99.4/93.5/92           | 97.8/97.5/96           | 0.167   | 98.8/87.4/77.8      | 96/90.2/77.2           | 0.786 |

|                     |                          |                                                       |                    |                                                              |                             |                                   | of SBRT                             |                                 |                                 |                  |                  |                  |         |
|---------------------|--------------------------|-------------------------------------------------------|--------------------|--------------------------------------------------------------|-----------------------------|-----------------------------------|-------------------------------------|---------------------------------|---------------------------------|------------------|------------------|------------------|---------|
| Stintzing, 2013     | CRC liver mets           | RFA 30, cyberknife 30 (tumors: RFA 35, cyberknife 35) | 24-26Gy (1F)       | unresectable mets., all mets. were curatively treated        | RFA 67% CK 47%              | No; no statistical differences    | no recurrence in the treated margin | 65/61% (1, 2 years, tumors)     | 85/80% (1,2 yrs, tumors)        | 0.20 (at 2 year) | MS 34.4mo        | MS 52.3mo        | 0.06    |
| Vigano, 2018        | CRC liver only mets      | RFA 19, SBRT 8 (tumors: RFA 27, SBRT 17)              | 75Gy (3F)          | liver only mets of CRC                                       |                             | NA                                |                                     | 63.0/56.4% (1, 2 years, tumors) | 70.8/70.8% (1, 2 years, tumors) | 0.261            |                  |                  |         |
| Jackson, 2018       | CRC and other liver mets | RFA 69, SBRT 92 (tumors: RFA 112, SBRT: 170)          | 24-61Gy (M50)/3-5F | unresectable mets. with limited or stable extraphepatic mets | RFA M1 (0-6), SBRT M1 (0-8) | No; SBRT arm had negative factors | RECIST                              | 74.7/60.6/60.6 %                | 96.0/88.2/82.2 %                | 0.057            | 75.0/50.2/43.3 % | 63.1/52.3/26.9 % | 0.6     |
| Nieuwenhuizen, 2021 | CRC liver mets           | RFA 144 SBRT 55                                       | 60Gy/3-12F         | colorectal liver metastases, not locally treated in prior    | previously untreated        | No; SBRT arm had negative factors |                                     | 95.6/93.3/91.5                  | 81.2/71.5/58.2                  | <0.0001          | 94/80/65%        | 84/61/37%        | p<0.001 |
| Yu J, 2021          | CRC liver mets           | RFA 178 SBRT 44 (after IPTW)                          | 36-60Gy in 3-5 F   | CRC liver mets <5 in numbers                                 | NA                          | Yes (IPTW)                        | RECIST                              | 72/ /58%                        | 90/ /76%                        | NS               | 91/74.5/56       | 96/69.8/58       | NS      |
| Gotohda, 2020       | CRC liver mets           | RFA 42 SBRT 5                                         |                    | CRC live rmets (M2.4cm)                                      | NA                          | NA                                |                                     |                                 |                                 |                  | 87.1/54/38.6     | 80/80/80%        |         |

Abbreviations: RT, radiotherapy; RFA, radiofrequency ablation; TACE, transarterial chemoembolization; NA, not assessbile; PFS, progression free survival; IPTW, inverse-probability treatment weighting; PSM, propensity-score matching; OS, overall survival; HFRT, hypofractionated radiotherapy; PBT, proton beam therapy; CRC, colorectal cancer; CK, cyberknife  
Heading of upper case M denoted median values and lower case m denoted mean values.

**Table S3.** Scoring sheet according to New-Castle Ottawa scale

|                    | Selection                                      |                                              |                              |                                                                | Comparability                                                            | Outcome                  |                                                          |                                           | Overall score<br>(9 to be full ) |
|--------------------|------------------------------------------------|----------------------------------------------|------------------------------|----------------------------------------------------------------|--------------------------------------------------------------------------|--------------------------|----------------------------------------------------------|-------------------------------------------|----------------------------------|
|                    | 1                                              | 2                                            | 3                            | 4                                                              | 1                                                                        | 1                        | 2                                                        | 3                                         |                                  |
|                    | Representativeness<br>of the exposed<br>cohort | Selection of<br>the non<br>exposed<br>cohort | Ascertainment<br>of exposure | Outcome of<br>interest was not<br>present at start<br>of study | Comparability of<br>cohorts on the basis<br>of the design or<br>analysis | Assessment<br>of outcome | Was follow-up<br>long enough for<br>outcomes to<br>occur | Adequacy<br>of follow<br>up of<br>cohorts |                                  |
| Ahuja              | 1                                              | 1                                            | 1                            | 1                                                              | 0                                                                        | 1                        | 0                                                        | 1                                         | 7                                |
| Shiozawa           | 1                                              | 1                                            | 1                            | 1                                                              | 0                                                                        | 1                        | 1                                                        | 1                                         | 7                                |
| Wahl               | 1                                              | 1                                            | 1                            | 1                                                              | 2                                                                        | 1                        | 1                                                        | 1                                         | 9                                |
| Duan               | 1                                              | 1                                            | 1                            | 1                                                              | 0                                                                        | 1                        | 1                                                        | 1                                         | 7                                |
| Feng               | 1                                              | 1                                            | 1                            | 1                                                              | 2                                                                        | 1                        | 1                                                        | 1                                         | 9                                |
| Rajyaguru          | 1                                              | 1                                            | 1                            | 1                                                              | 2                                                                        | 1                        | 1                                                        | 1                                         | 9                                |
| Kim                | 1                                              | 1                                            | 1                            | 1                                                              | 2                                                                        | 1                        | 1                                                        | 1                                         | 9                                |
| Stintzing          | 1                                              | 1                                            | 1                            | 1                                                              | 0                                                                        | 1                        | 1                                                        | 1                                         | 8                                |
| Viganò             | 1                                              | 1                                            | 1                            | 1                                                              | 0                                                                        | 1                        | 1                                                        | 1                                         | 8                                |
| Jackson            | 1                                              | 1                                            | 1                            | 1                                                              | 0                                                                        | 1                        | 1                                                        | 1                                         | 8                                |
| Hara               | 1                                              | 1                                            | 1                            | 1                                                              | 2                                                                        | 1                        | 1                                                        | 1                                         | 9                                |
| Ji R               | 1                                              | 1                                            | 1                            | 1                                                              | 0                                                                        | 1                        | 1                                                        | 1                                         | 7                                |
| Ueno               | 1                                              | 1                                            | 1                            | 1                                                              | 2                                                                        | 1                        | 1                                                        | 1                                         | 9                                |
| Kim N              | 1                                              | 1                                            | 1                            | 1                                                              | 2                                                                        | 1                        | 1                                                        | 1                                         | 9                                |
| Kim T              | 1                                              | 1                                            | 1                            | 1                                                              | 2                                                                        | 1                        | 1                                                        | 1                                         | 9                                |
| Moon               | 1                                              | 1                                            | 1                            | 1                                                              | 0                                                                        | 1                        | 0                                                        | 1                                         | 7                                |
| Chen LC            | 1                                              | 1                                            | 1                            | 1                                                              | 0                                                                        | 1                        | 0                                                        | 1                                         | 7                                |
| Jeong              | 1                                              | 1                                            | 1                            | 1                                                              | 2                                                                        | 1                        | 1                                                        | 1                                         | 9                                |
| Nieuwenhuizen<br>S | 1                                              | 1                                            | 1                            | 1                                                              | 0                                                                        | 1                        | 1                                                        | 1                                         | 7                                |



|         |   |   |   |   |   |   |   |   |   |
|---------|---|---|---|---|---|---|---|---|---|
| Yu J    | 1 | 1 | 1 | 1 | 2 | 1 | 1 | 1 | 9 |
| Gotohda | 1 | 1 | 1 | 1 | 0 | 1 | 0 | 1 | 6 |

**Scoring note:**

**Selection criteria:** The representativeness (Category 1) was high in that all studies were conducted on patients with a highly specific clinical category who received local treatment (RFA or SBRT) for small intrahepatic malignancies. Most of the treatment was performed in a tertiary hospital, and ascertainment of exposure (Category 3) was also satisfied because all information was obtained from secure medical records. Regarding outcomes of interest (Category 4), since the main outcomes of interest are survival and tumor control, they cannot present before treatment; hence, the category is satisfied in all studies. Considering that SBRT is the modality of interest, non-exposed cohort is drawn from very similar population of which has common clinical indication; therefore all studies scored one point (Category 2).

**Comparability:** Full score (2 points) was given if the study compared two arms in regard of  $\geq 2$  known clinical factors (including but not limited to, age, Child-Pugh score, tumor size, tumor location); 0 points were assigned for studies without statistical comparison between arms.

**Outcome:** All studies had data from secure medical records; hence, all studies had one point in Category 6. Considering the life expectancy of small HCC or liver metastases patients, only studies without follow-up period information or with median follow-up period less than 1 year scored 0 point, and all other studies (having 1 year or longer follow-up) scored 1 point. All studies were conducted in a tertiary hospital targeting cancer patients, and since follow-up loss was minimal and did not impair the reliability of the study results, all studies scored 1 point in Category 8.

## Supplementary reference

1. Apisarnthanarax, Smith, et al. External beam radiation therapy for primary liver cancers: An ASTRO clinical practice guideline. *Practical radiation oncology*, 2022, 12.1: 28-51.
